# Supplementary material
Source: PubMed Central journal article supplement (PMC5921899)
Supplement: NIHMS952492-supplement-Supplemental.pdf [file NIHMS952492-supplement-Supplemental.pdf]

Supplementary Information

CW EPR Parameters Reveal Cytochrome P450 Binding Modes

Molly M. Lockart<sup>1</sup>, Carlo A. Rodriguez<sup>1</sup>, William M. Atkins<sup>2</sup>, Michael K. Bowman<sup>1,\*</sup>

<sup>1</sup>Department of Chemistry and Biochemistry, Box 870336, University of Alabama, Tuscaloosa, AL

35487-0336 United States

<sup>2</sup>Department of Medicinal Chemistry, Box 357610, University of Washington, Seattle, WA 98195-7610

United States

## SI Section 1: CW and HYSCORE spectra

CW spectra (plotted as absorbance) and corresponding HYSCORE spectra. Assignments are listed and justified, where WB and DC stand for water-bridged and directly-coordinated components, respectively. Resting state components and components that were left as unknown assignments are also listed.

### CYP3A4 no ligand

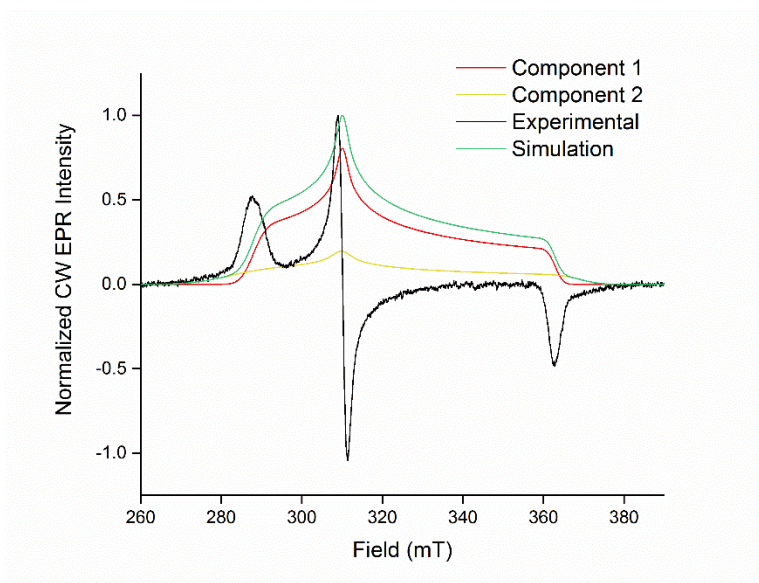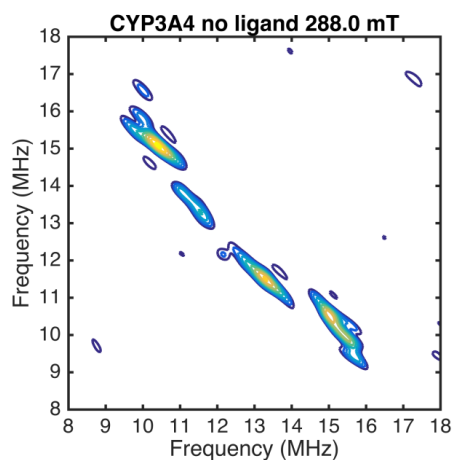

CYP3A4 no ligand component 1: resting state enzyme

CYP3A4 no ligand component 2: no HYSCORE data available; left as unknown.

## CYP3A4 17-click

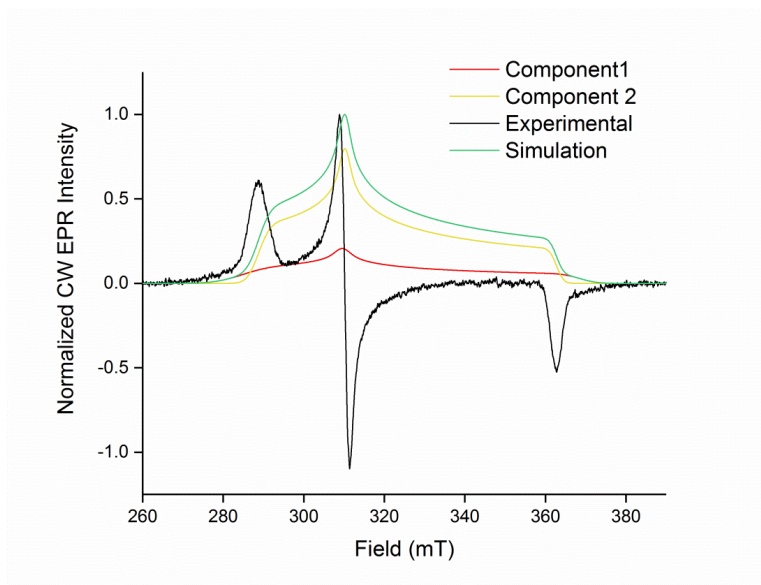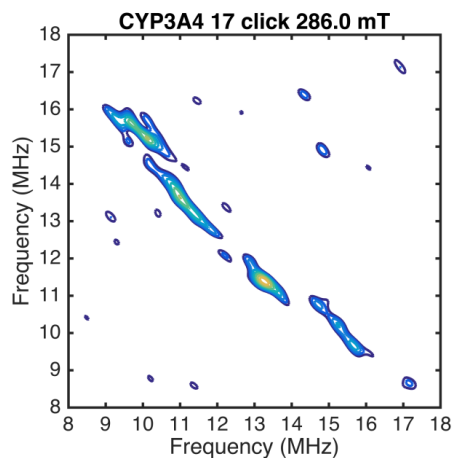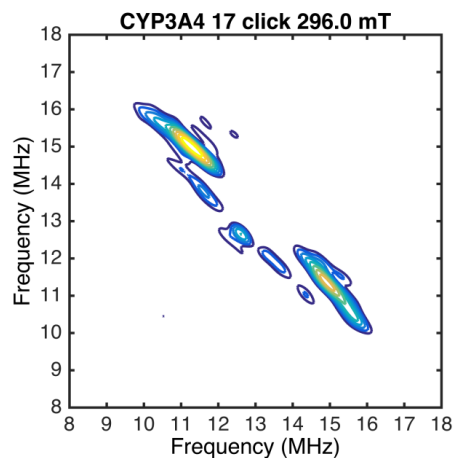

CYP3A4 17-click component 1: WB

CYP3A4 17-click component 2: Unknown, no HYSCORE data available for a lower field where component 1 does not contribute. Water signal significantly decreases relative to cysteine, so DC is likely.

# CYP3A4 17-EE

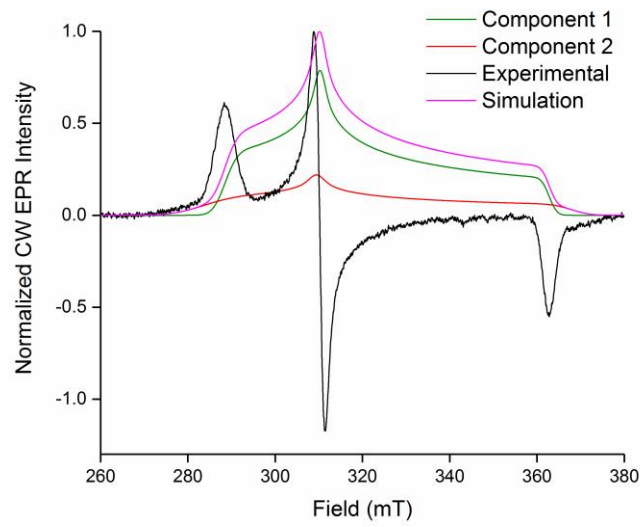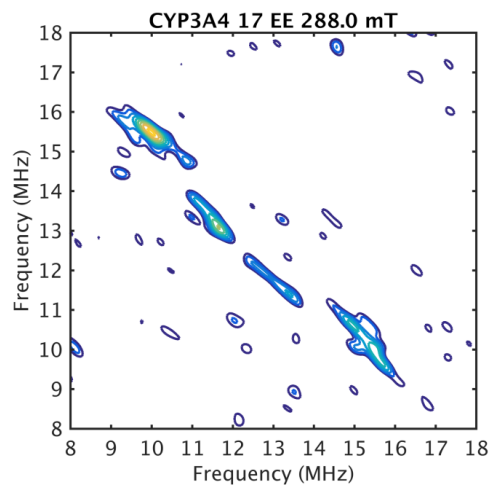

CYP3A4 17-EE component 1: WB

CYP3A4 17-EE component 2: No HYSORE data available; left as unknown.

## CYP3A4 123-TRZ

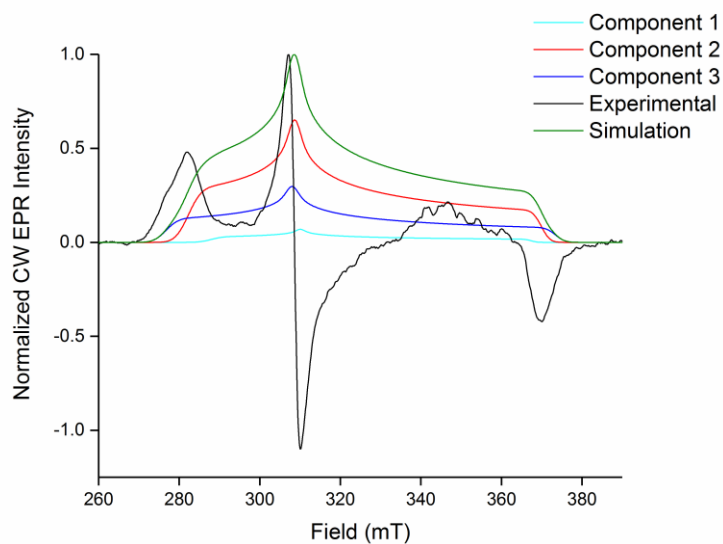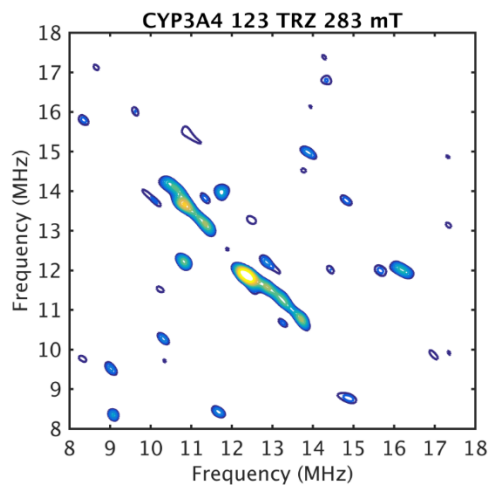

CYP3A4 123-TRZ component 1: No HYSCORE data that distinguishes it from other components; left as unknown.

CYP3A4 123-TRZ component 2: DC; makes up significant amount of signal at 283.0 mT

CYP3A4 123-TRZ component 3: DC; makes up significant amount of signal at 283.0 mT

## CYP3A4 124-TRZ

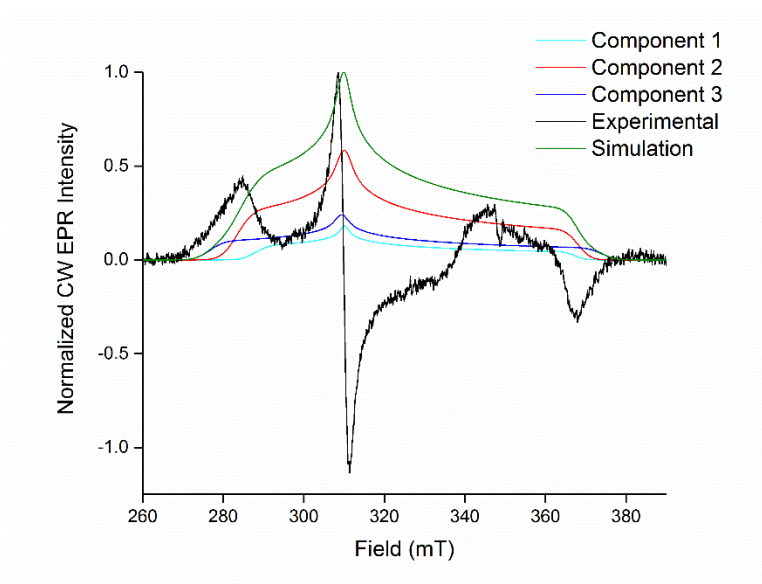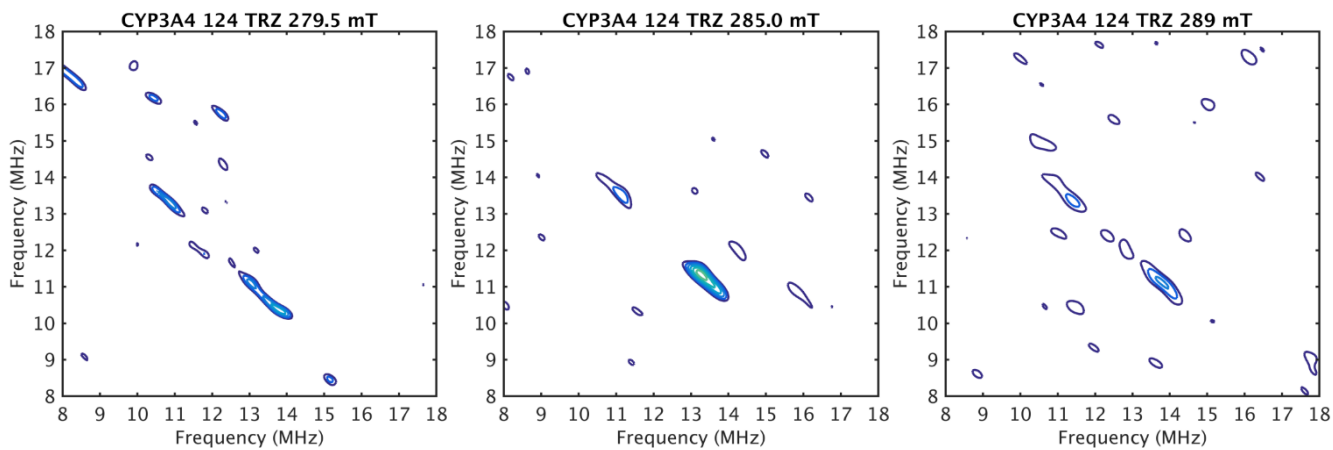

CYP3A4 124-TRZ component 1: Potential water protons not above noise level; left as unknown.

CYP3A4 124-TRZ component 2: DC

CYP3A4 124-TRZ component 3: DC

## CYP3A4 IMZ

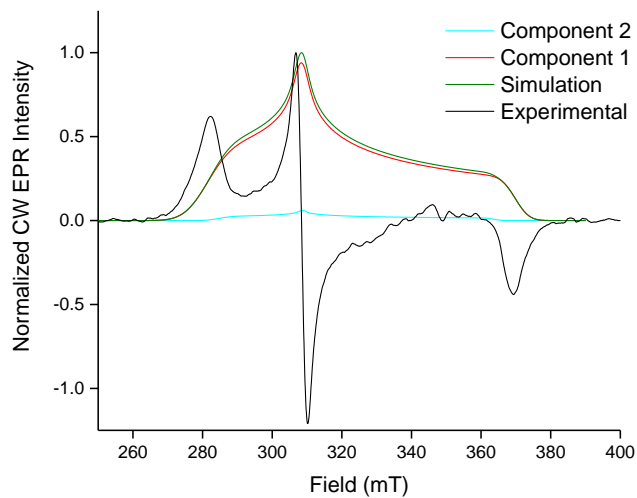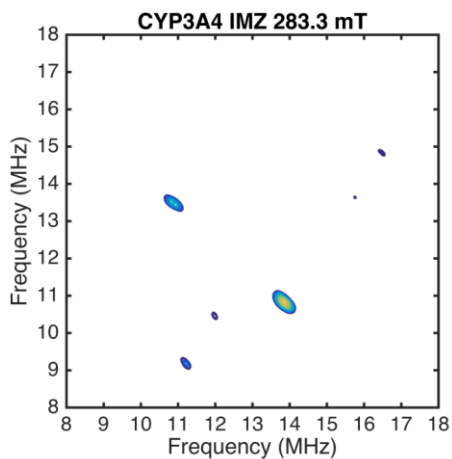

CYP3A4 IMZ component 1: DC; no water protons at a field where component 1 contributes significantly to overall signal.

CYP3A4 IMZ component 2: UKN; overlaps with component 1. No HYSORE data available that will sufficiently separate it from component 1.

## CYP3A4 APAP

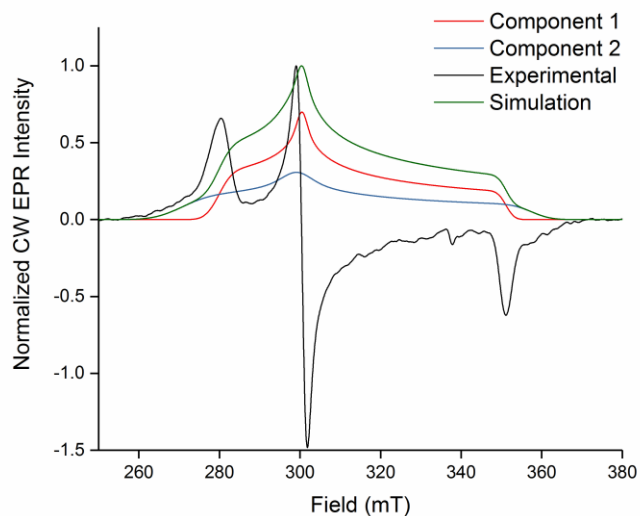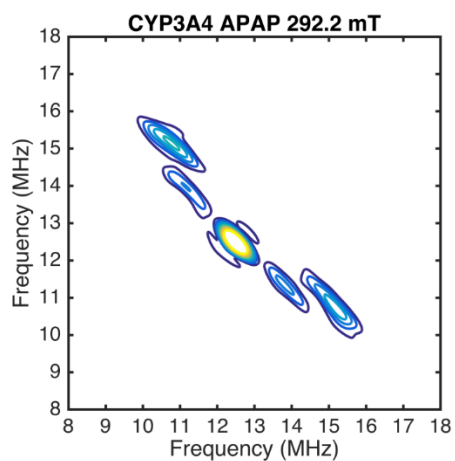

CYP3A4 APAP component 1: WB; intense water proton peaks at a field where component 1 contributes significantly to overall signal.

CYP3A4 APAP component 2: UKN; overlaps with component 1. No HYSCORE data available that will sufficiently separate it from component 1.



## CYP3A4 caffeine

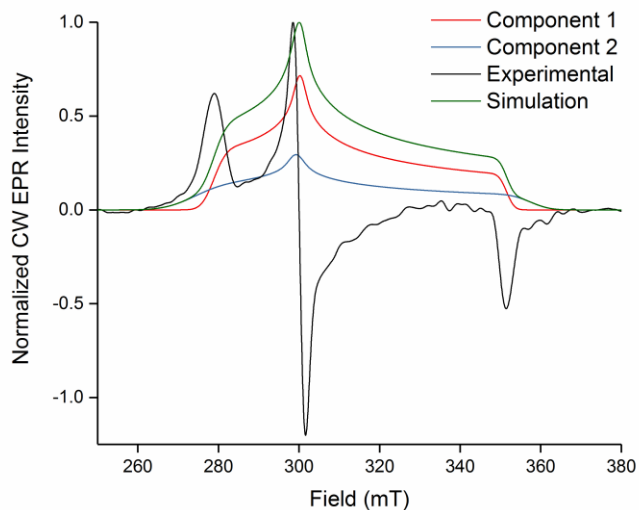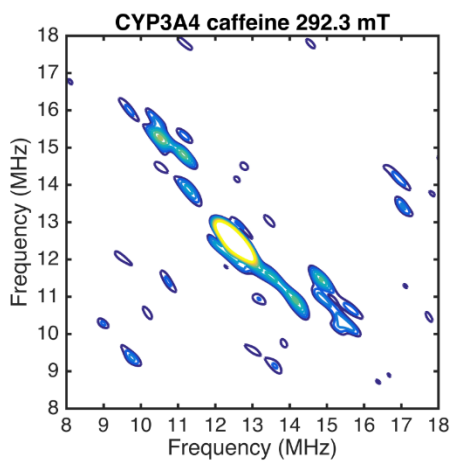

CYP3A4 caffeine component 1: WB; intense water proton peaks at a field where component 1 contributes significantly to overall signal.

CYP3A4 caffeine component 2: UKN; overlaps with component 1. No HYSORE data available that will sufficiently separate it from component 1.

## CYP3A4 APAP/caffeine

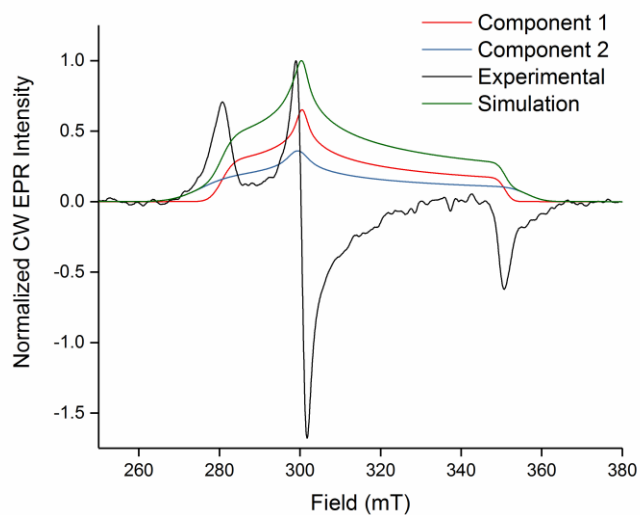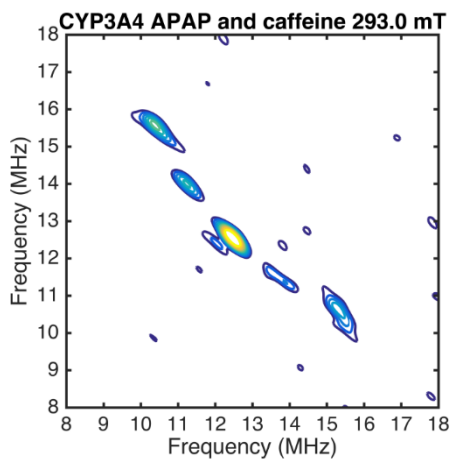

CYP3A4 APAP/caffeine component 1: WB; intense water proton peaks at a field where component 1 contributes significantly to overall signal.

CYP3A4 APAP/caffeine component 2: UKN; overlaps with component 1. No HYSORE data available that will sufficiently separate it from component 1.

# CYP2C9d No Ligand

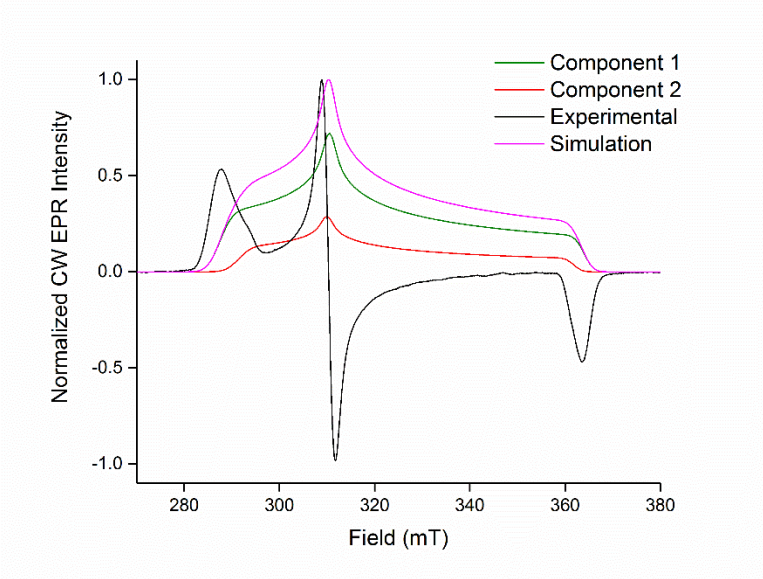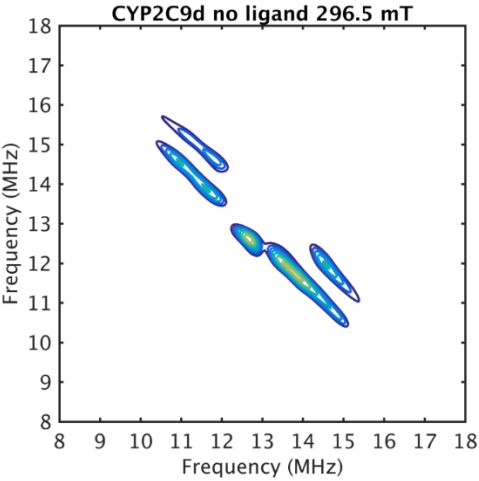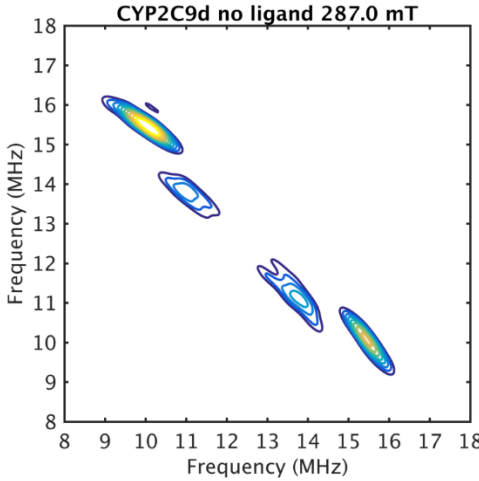

CYP2C9d no ligand component 1: resting state enzyme  
CYP2C9d no ligand component 2: resting state enzyme

## CYP2C9d 123-TRZ

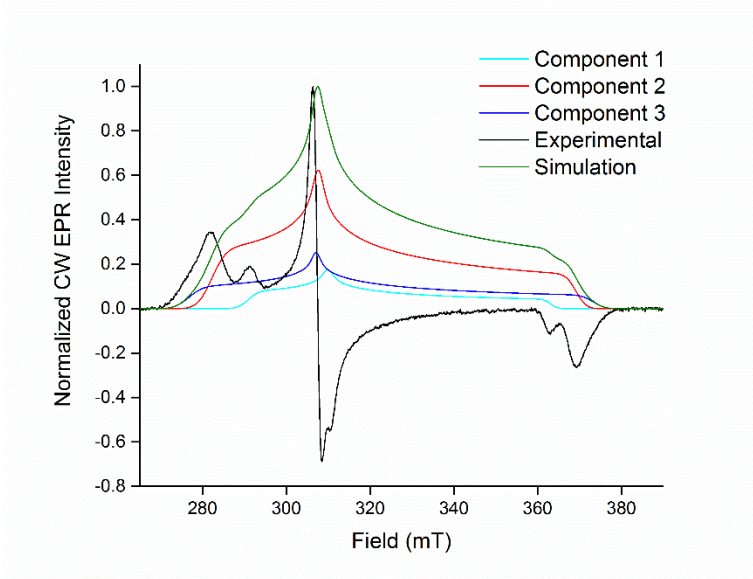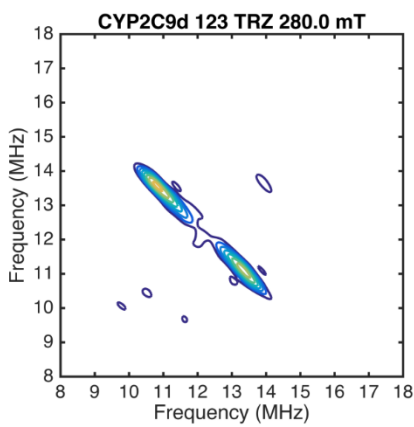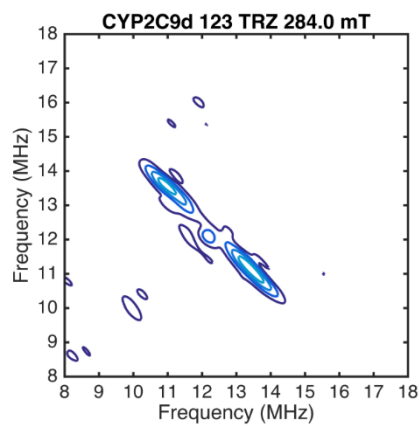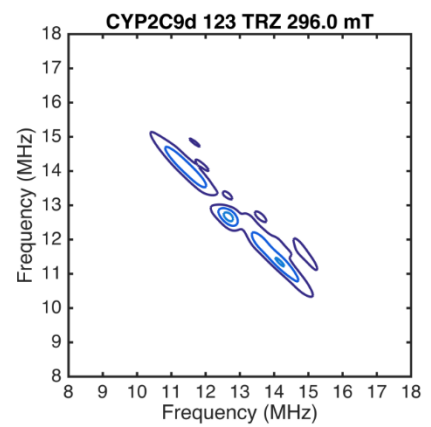

CYP2C9d 123-TRZ component 1: WB. Proton signal is weak, but it is not present at all at lower fields where only components 2 and 3 are present. Component 1 does not make up the majority of the signal at 296.0 mT, so the water proton peaks are expected to be weak if they are present.

CYP2C9d 123-TRZ component 2: DC

CYP2C9d 123-TRZ component 3: DC

## CYP2C9d 124-TRZ

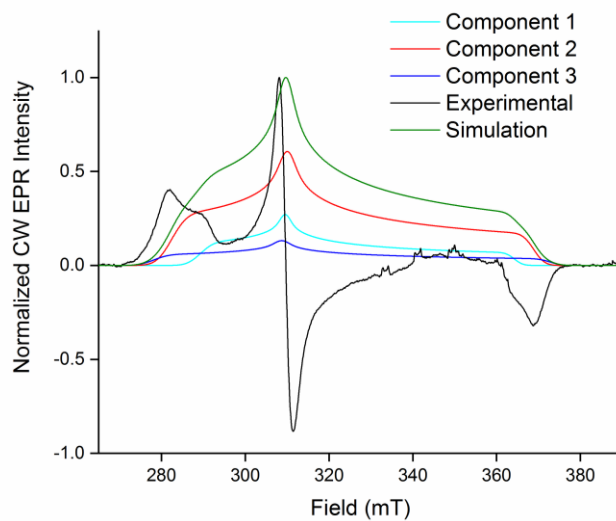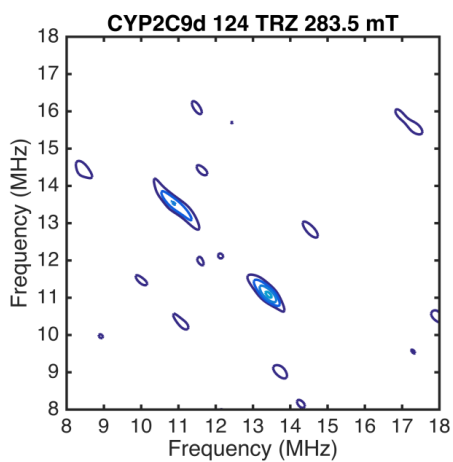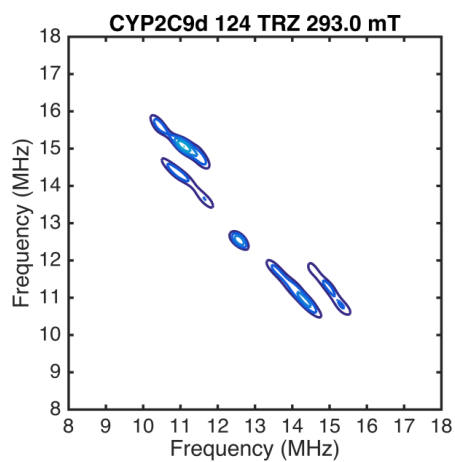

CYP2C9d 124-TRZ component 1: WB. The water proton peaks are not present at 283.5 mT, where only components 2 and 3 are present. They are relatively intense at 293.0 mT where component 1 starts to contribute to the overall signal.

CYP2C9d 124-TRZ component 2: DC

CYP2C9d 124-TRZ component 3: DC

## CYP2C9d PPT

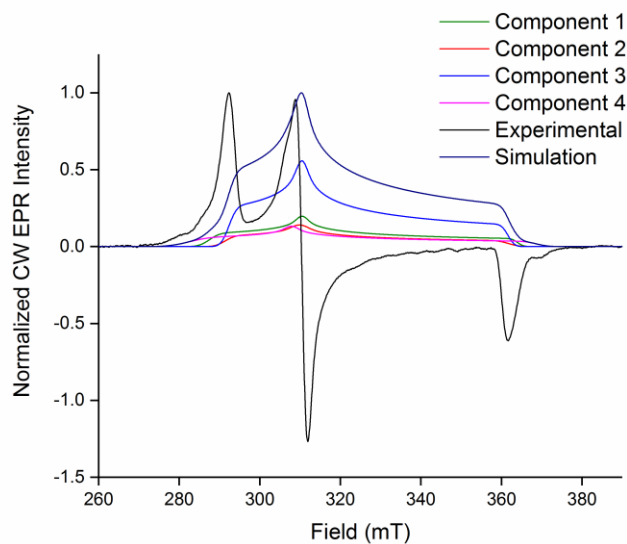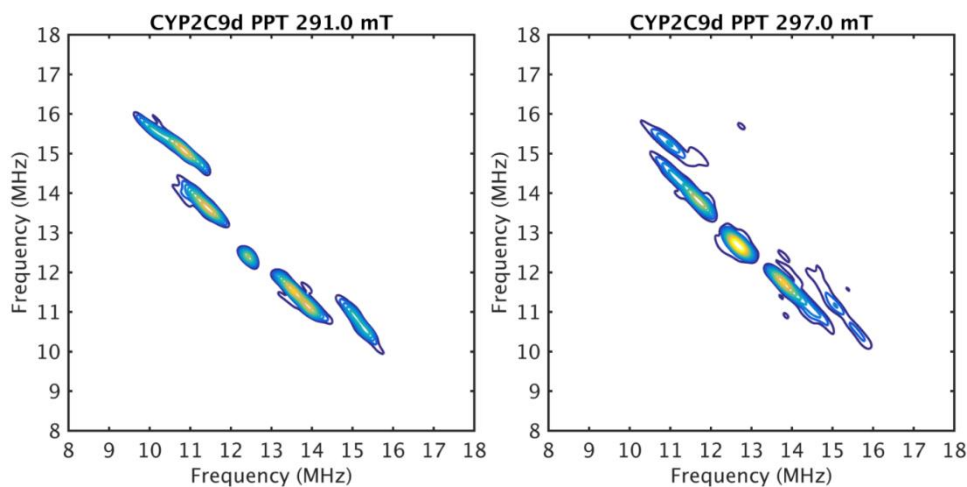

CYP2C9d PPT component 1: Residual resting state enzyme

CYP2C9d PPT component 2: Residual resting state enzyme

CYP2C9d PPT component 3: DC. It is the only signal that is dramatically increasing from 291.0 mT to 297.0 mT. The only other signals that increases in that range are components 1 and 2, but those represent residual resting state enzyme and therefore should increase the intensity of the water proton peaks in that range. The intensity decreases, suggesting that component 3 is DC.

CYP2C9d PPT component 4: No HYSORE data available at a field that distinguishes it from other components; left as unknown.

## CYP2C9d IMZ

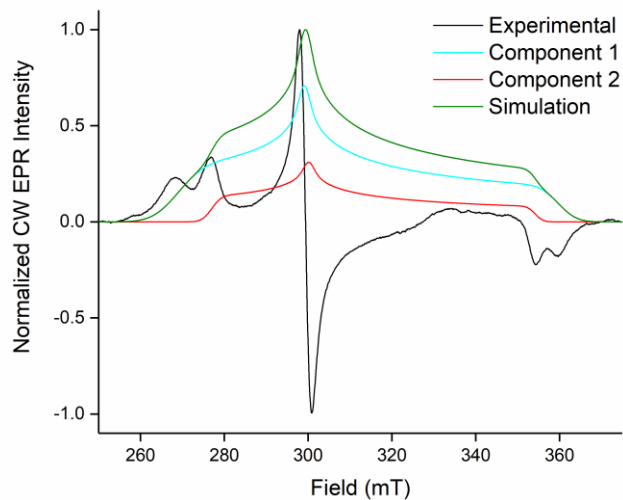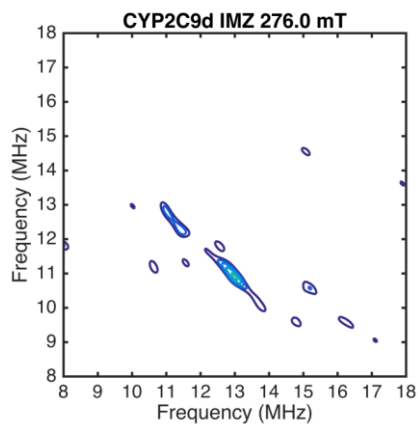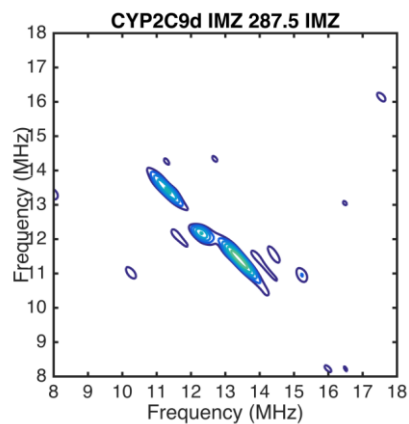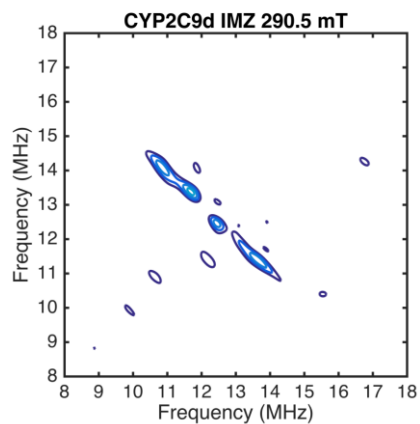

CYP2C9d IMZ component 1: DC. No water peaks present at a field where it contributes significantly to the overall spectrum.

CYP2C9d IMZ component 2: DC. Still no water peaks present at fields where it is contributing to overall spectrum.

## SI Section 2: Tables of drug concentrations and all CW parameters

| Sample                    | Concentration |
|---------------------------|---------------|
| CYP3A4 with 123-TRZ       | 50 mM         |
| CYP3A4 with 124-TRZ       | 40 $\mu$ M    |
| CYP3A4 with 17-click      | 225 $\mu$ M   |
| CYP3A4 with 17-EE         | 160 $\mu$ M   |
| CYP3A4 with acetaminophen | 1 mM          |
| CYP3A4 with caffeine      | 1 mM          |
| CYP3A4 with imidazole     | 4 mM          |
| CYP2C9d with 123-TRZ      | 350 $\mu$ M   |
| CYP2C9d with 124-TRZ      | 200 $\mu$ M   |
| CYP2C9d with PPT          | 350 $\mu$ M   |
| CYP2C9d with imidazole    | 500 $\mu$ M   |

Table S1: Concentrations of all drugs used.



| Sample Component                  | $g_x$ | $g_y$ | $g_z$ | $g_x$ strain | $g_y$ strain | $g_z$ strain | weight | weight (%) | tetragonal field | rhombicity | binding mode |
|-----------------------------------|-------|-------|-------|--------------|--------------|--------------|--------|------------|------------------|------------|--------------|
| CYP3A4 resting                    | 1.923 | 2.251 | 2.425 | 0.019        | 0.015        | 0.050        | 1.740  | 76.30      | 5.357            | 0.914      | resting      |
| CYP3A4 resting                    | 1.891 | 2.255 | 2.486 | 0.046        | 0.025        | 0.152        | 0.540  | 23.70      | 5.129            | 0.816      | resting      |
| CYP3A4 with 17click               | 1.924 | 2.250 | 2.418 | 0.017        | 0.015        | 0.045        | 0.915  | 76.30      | 5.342            | 0.930      | WB           |
| CYP3A4 with 17click               | 1.894 | 2.256 | 2.457 | 0.041        | 0.023        | 0.109        | 0.284  | 23.60      | 4.986            | 0.884      | UKN          |
| CYP3A4 with 17EE                  | 1.924 | 2.250 | 2.420 | 0.018        | 0.015        | 0.044        | 0.919  | 75.10      | 5.365            | 0.922      | WB           |
| CYP3A4 with 17EE                  | 1.897 | 2.257 | 2.467 | 0.041        | 0.021        | 0.115        | 0.304  | 24.90      | 5.076            | 0.859      | UKN          |
| CYP3A4 with 123 Triazole          | 1.900 | 2.251 | 2.425 | 0.014        | 0.013        | 0.045        | 0.120  | 5.80       | 4.968            | 0.945      | UKN          |
| CYP3A4 with 123 Triazole          | 1.887 | 2.261 | 2.474 | 0.021        | 0.019        | 0.053        | 1.300  | 62.80      | 4.879            | 0.871      | DC           |
| CYP3A4 with 123 Triazole          | 1.869 | 2.266 | 2.523 | 0.022        | 0.020        | 0.051        | 0.650  | 31.40      | 4.820            | 0.800      | DC           |
| CYP3A4 with 124 Triazole          | 1.900 | 2.251 | 2.425 | 0.024        | 0.012        | 0.053        | 0.064  | 15.30      | 4.968            | 0.945      | UKN          |
| CYP3A4 with 124 Triazole          | 1.896 | 2.251 | 2.464 | 0.031        | 0.022        | 0.063        | 0.244  | 58.40      | 5.152            | 0.848      | DC           |
| CYP3A4 with 124 Triazole          | 1.866 | 2.256 | 2.524 | 0.032        | 0.019        | 0.061        | 0.110  | 26.30      | 4.954            | 0.771      | DC           |
| CYP3A4 with IMZ                   | 1.919 | 2.261 | 2.452 | 0.019        | 0.012        | 0.057        | 0.089  | 78.40      | 4.911            | 0.868      | DC           |
| CYP3A4 with IMZ                   | 1.887 | 2.265 | 2.485 | 0.038        | 0.024        | 0.110        | 1.693  | 21.60      | 4.593            | 0.817      | UKN          |
| CYP3A4 with APAP                  | 1.924 | 2.248 | 2.414 | 0.021        | 0.017        | 0.051        | 2.312  | 57.90      | 5.351            | 0.934      | WB           |
| CYP3A4 with APAP                  | 1.891 | 2.255 | 2.486 | 0.053        | 0.043        | 0.115        | 1.679  | 42.10      | 5.129            | 0.816      | UKN          |
| CYP3A4 with APAP and 1mM caffeine | 1.925 | 2.247 | 2.408 | 0.019        | 0.016        | 0.048        | 2.094  | 58.30      | 5.345            | 0.948      | WB           |
| CYP3A4 with APAP and 1mM caffeine | 1.896 | 2.257 | 2.458 | 0.042        | 0.030        | 0.121        | 1.496  | 41.70      | 5.013            | 0.880      | UKN          |
| CYP3A4 with 1 mM caffeine         | 1.920 | 2.249 | 2.422 | 0.020        | 0.018        | 0.050        | 2.149  | 67.30      | 5.336            | 0.917      | WB           |
| CYP3A4 with 1 mM caffeine         | 1.888 | 2.257 | 2.470 | 0.046        | 0.023        | 0.123        | 1.044  | 32.70      | 4.944            | 0.865      | UKN          |

Table S2: All CYP3A4 sample components with their corresponding g-values, g-strains, weights, tetragonal field, rhombicity, and assigned binding mode. Components labeled in blue as “resting” are resting state enzyme, “DC” are directly-coordinated, “WB” are water-bridged, and “UKN” are unknown components where a binding mode could not be assigned.

| Sample Component          | $g_x$ | $g_y$ | $g_z$ | $g_x$ strain | $g_y$ strain | $g_z$ strain | weight | weight (%) | tetragonal field | rhombicity | binding mode |
|---------------------------|-------|-------|-------|--------------|--------------|--------------|--------|------------|------------------|------------|--------------|
| CYP2C9D resting           | 1.917 | 2.248 | 2.429 | 0.019        | 0.016        | 0.042        | 0.797  | 74.00      | 5.352            | 0.899      | resting      |
| CYP2C9D resting           | 1.929 | 2.252 | 2.396 | 0.018        | 0.015        | 0.042        | 0.287  | 26.00      | 5.214            | 1.004      | resting      |
| CYP2C9D with 123 Triazole | 1.922 | 2.252 | 2.400 | 0.017        | 0.015        | 0.038        | 0.240  | 14.20      | 5.121            | 1.001      | WB           |
| CYP2C9D with 123 Triazole | 1.891 | 2.269 | 2.474 | 0.023        | 0.015        | 0.055        | 1.018  | 53.70      | 4.791            | 0.894      | DC           |
| CYP2C9D with 123 Triazole | 1.870 | 2.273 | 2.523 | 0.026        | 0.012        | 0.057        | 0.436  | 23.00      | 4.711            | 0.821      | DC           |
| CYP2C9D with 124 Triazole | 1.916 | 2.255 | 2.414 | 0.020        | 0.016        | 0.049        | 0.304  | 22.80      | 5.062            | 0.976      | WB           |
| CYP2C9D with 124 Triazole | 1.892 | 2.251 | 2.473 | 0.025        | 0.024        | 0.059        | 0.838  | 62.70      | 5.144            | 0.832      | DC           |
| CYP2C9D with 124 Triazole | 1.872 | 2.261 | 2.510 | 0.026        | 0.024        | 0.059        | 0.194  | 14.50      | 4.881            | 0.807      | DC           |
| CYP2C9D with PPT          | 1.917 | 2.248 | 2.429 | 0.015        | 0.018        | 0.041        | 0.200  | 20.00      | 5.352            | 0.899      | resting      |
| CYP2C9D with PPT          | 1.929 | 2.252 | 2.396 | 0.026        | 0.028        | 0.037        | 0.140  | 14.00      | 5.214            | 1.004      | resting      |
| CYP2C9D with PPT          | 1.930 | 2.248 | 2.388 | 0.016        | 0.019        | 0.030        | 0.510  | 51.00      | 5.263            | 1.012      | DC           |
| CYP2C9D with PPT          | 1.893 | 2.268 | 2.474 | 0.028        | 0.021        | 0.081        | 0.150  | 15.00      | 4.845            | 0.888      | UKN          |
| CYP2C9d with IMZ          | 1.875 | 2.257 | 2.512 | 0.042        | 0.016        | 0.106        | 1.290  | 72.60      | 5.010            | 0.786      | DC           |
| CYP2C9d with IMZ          | 1.905 | 2.248 | 2.437 | 0.019        | 0.017        | 0.038        | 0.488  | 27.40      | 5.188            | 0.893      | DC           |

Table S3: All CYP2C9d sample components with their corresponding g-values, g-strains, weights, tetragonal field, rhombicity, and assigned binding mode. Components labeled in blue as “resting” are resting state enzyme, “DC” are directly-coordinated, “WB” are water-bridged, and “UKN” are unknown components where a binding mode could not be assigned.

### SI Section 3: Annotated figures

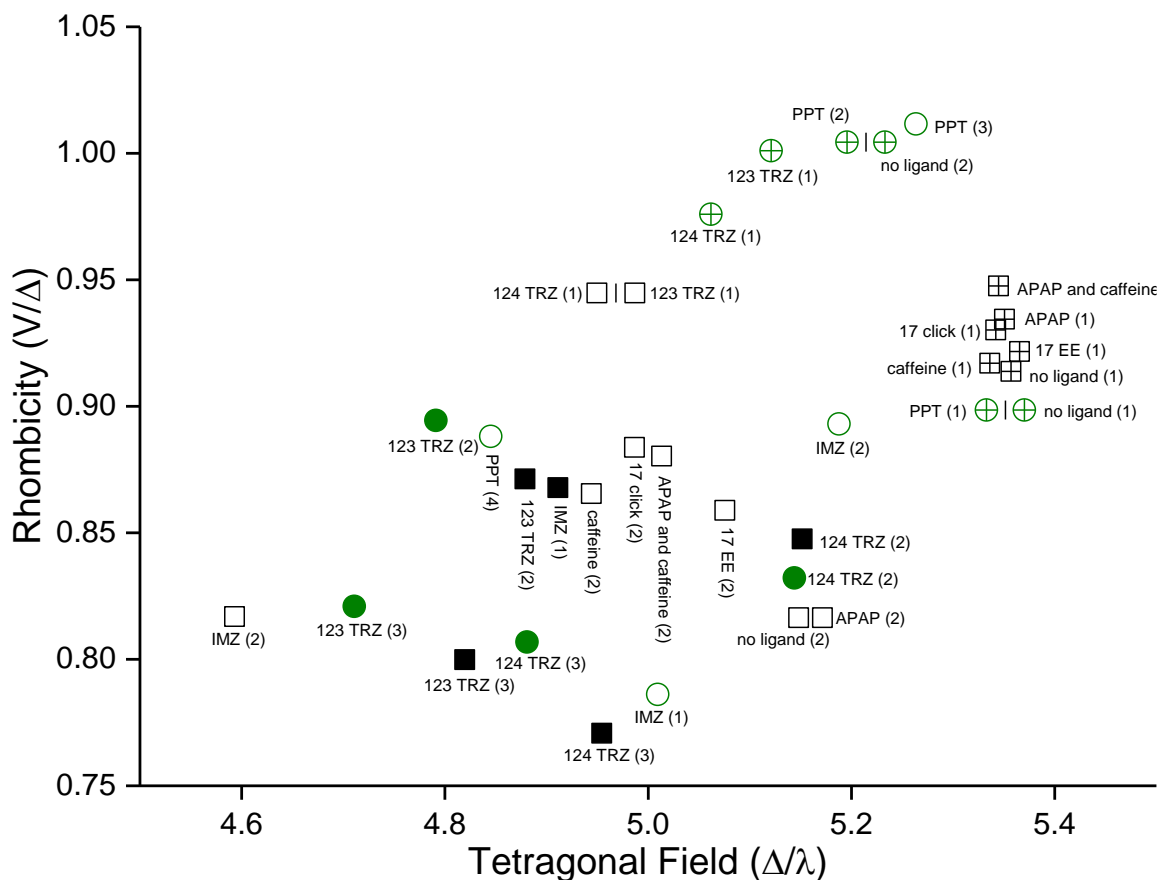

Figure S1: Correlation of binding mode with ligand-field parameters. Points are colored by isoform; green circles are CYP2C9d components and black squares are CYP3A4 components. Solid symbols represent directly-coordinated components, symbols filled with a + represent water-bridged components, and open symbols represent components for which the binding mode could not be assigned. Points have been labeled with their corresponding component.

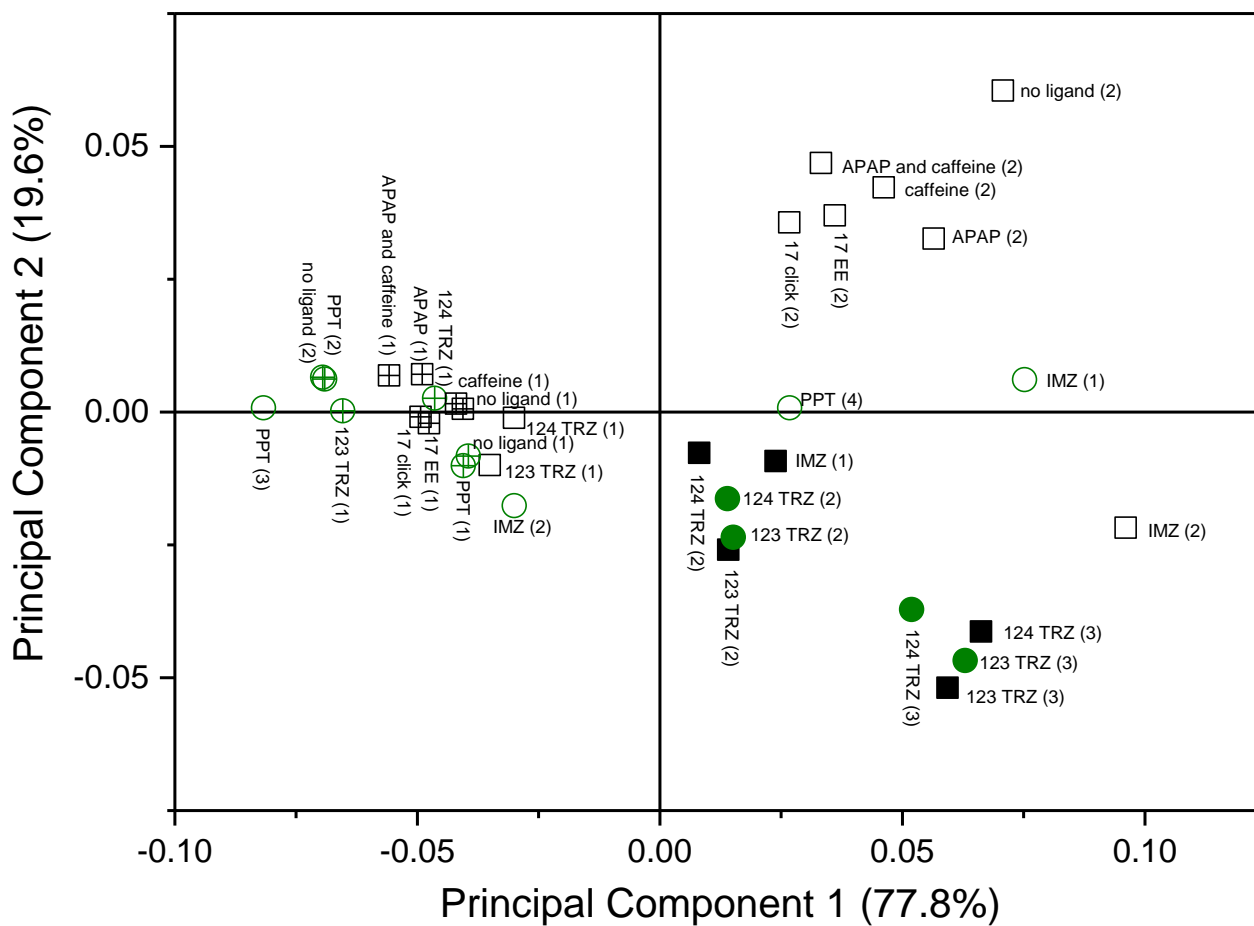

Figure S2: A biplot of the scores with respect to the first and second principal components. Points are colored by isoform; green circles are CYP2C9d components and black squares are CYP3A4 components. Solid symbols represent directly-coordinated components, symbols filled with a + represent water-bridged components, and open symbols represent components for which the binding mode could not be assigned. Points have been labeled with their corresponding component.
